## Correction: Kinetic change of serum carcinoembryonic antigen can early predict progression in patients with metastatic non-small cell lung cancer during maintenance therapy with bevacizumab plus pemetrexed

**Nasha Zhang<sup>1,2</sup>, Li Kong<sup>2,3</sup>, Fang Shi<sup>2,3</sup>, Wang Jing<sup>2</sup>, Haiyong Wang<sup>2,3</sup>, Ming Yang<sup>2,3</sup>, Jinming Yu<sup>2,3</sup> and Hui Zhu<sup>2,3</sup>**

<sup>1</sup> Cheeloo College of Medicine, Shandong University, Jinan, China

<sup>2</sup> Department of Radiation Oncology, Shandong Cancer Hospital and Institute, Shandong Cancer Hospital Affiliated to Shandong University, Jinan, China

<sup>3</sup> Shandong Academy of Medical Sciences, Jinan, China

**Published:** December 15, 2017

**Copyright:** Zhang et al. This is an open-access article distributed under the terms of the Creative Commons Attribution License 3.0 (CC BY 3.0), which permits unrestricted use, distribution, and reproduction in any medium, provided the original author and source are credited.

This article has been corrected: the authors first and last names order was updated.

Original article: Oncotarget. 2017; 8:74910-74916. <https://doi.org/10.18632/oncotarget.20456>
